# Supplementary material for: Rotationally resolved magnetic vibrational circular dichroism of the paramagnetic molecule NO
Source: Royal Society of Chemistry journal article supplement (doi:10.1039/c2cp40950j), 2012-01-01
Supplement: c2cp40950j.pdf [file c2cp40950j.pdf]

Supplementary Material for PCCP:

## **Rotationally Resolved Magnetic Vibrational Circular Dichroism of the Paramagnetic Molecule NO**

**Baoliang Wang,<sup>a</sup> Petr Bour<sup>b\*</sup> and Timothy A. Keiderling<sup>c\*</sup>**

<sup>a</sup> Hinds Instruments, Inc., 7245 NW Evergreen Pkwy., Hillsboro, OR 97124, USA

<sup>b</sup> Institute of Organic Chemistry and Biochemistry, Academy of Sciences,  
Flemingovo nám. 2, Prague 6, Czech Republic

<sup>c</sup> Department of Chemistry, University of Illinois at Chicago  
845 W. Taylor, Chicago, IL 60607-7061 USA

\*Authors to whom correspondence should be addressed.

Email [bour@uochb.cas.cz](mailto:bour@uochb.cas.cz) (PB) and [tak@uic.edu](mailto:tak@uic.edu) (TAK).

**Table S1.** Spectroscopic parameters used for simulation of NO MVCD.<sup>a</sup>

---

|                                          |                                |
|------------------------------------------|--------------------------------|
| ground vibrational state ( $\nu = 0$ ):  | $A = 123.1393 \text{ cm}^{-1}$ |
|                                          | $B = 1.696115 \text{ cm}^{-1}$ |
| excited vibrational state ( $\nu = 1$ ): | $A = 122.8935 \text{ cm}^{-1}$ |
|                                          | $B = 1.678544 \text{ cm}^{-1}$ |
| $h\nu = 1875.972 \text{ cm}^{-1}$        |                                |
| T = 298 K                                |                                |

---

<sup>a</sup> J. M. Brown, M. Kaise, C. M. L. Kerr and D. J. Milton, *Mol. Phys.*, 1978, **36**, 553-582.

**Table S2.** Calculated  $g_J$ -values based on Radford's theory (eqn. 9).

| J    | $^2\Pi_{1/2}$ |            | $^2\Pi_{3/2}$ |            |
|------|---------------|------------|---------------|------------|
|      | $g_J(v=0)$    | $g_J(v=1)$ | $g_J(v=0)$    | $g_J(v=1)$ |
| 0.5  | 0.0000        | 0.0000     | 4.0000        | 4.0000     |
| 1.5  | 0.0231        | 0.0229     | 0.7769        | 0.7771     |
| 2.5  | 0.0264        | 0.0261     | 0.3165        | 0.3167     |
| 3.5  | 0.0274        | 0.0271     | 0.1631        | 0.1633     |
| 4.5  | 0.0278        | 0.0275     | 0.0934        | 0.0937     |
| 5.5  | 0.0279        | 0.0277     | 0.0560        | 0.0562     |
| 6.5  | 0.0279        | 0.0277     | 0.0336        | 0.0338     |
| 7.5  | 0.0279        | 0.0277     | 0.0192        | 0.0194     |
| 8.5  | 0.0278        | 0.0275     | 0.0094        | 0.0096     |
| 9.5  | 0.0276        | 0.0274     | 0.0025        | 0.0027     |
| 10.5 | 0.0274        | 0.0272     | -0.0026       | -0.0024    |
| 11.5 | 0.0272        | 0.0270     | -0.0064       | -0.0062    |
| 12.5 | 0.0270        | 0.0268     | -0.0092       | -0.0090    |
| 13.5 | 0.0268        | 0.0266     | -0.0115       | -0.0112    |
| 14.5 | 0.0265        | 0.0263     | -0.0132       | -0.0130    |
| 15.5 | 0.0263        | 0.0261     | -0.0145       | -0.0143    |
| 16.5 | 0.0260        | 0.0258     | -0.0156       | -0.0154    |
| 17.5 | 0.0257        | 0.0255     | -0.0164       | -0.0162    |
| 18.5 | 0.0254        | 0.0252     | -0.0171       | -0.0169    |
| 19.5 | 0.0251        | 0.0249     | -0.0176       | -0.0174    |
| 20.5 | 0.0248        | 0.0246     | -0.0180       | -0.0178    |
| 21.5 | 0.0245        | 0.0243     | -0.0183       | -0.0181    |
| 22.5 | 0.0242        | 0.0240     | -0.0185       | -0.0183    |
| 23.5 | 0.0239        | 0.0237     | -0.0186       | -0.0185    |
| 24.5 | 0.0235        | 0.0234     | -0.0187       | -0.0186    |
| 25.5 | 0.0232        | 0.0231     | -0.0188       | -0.0186    |
| 26.5 | 0.0229        | 0.0228     | -0.0188       | -0.0187    |
| 27.5 | 0.0226        | 0.0225     | -0.0188       | -0.0186    |
| 28.5 | 0.0223        | 0.0222     | -0.0187       | -0.0186    |
| 29.5 | 0.0220        | 0.0219     | -0.0186       | -0.0185    |
| 30.5 | 0.0217        | 0.0216     | -0.0185       | -0.0184    |

**Table S3.** Moment analysis results for the  $\text{NO}^2 \Pi_{1/2}$  experimental transitions at 0.2

Tesla.

|                 | $\nu_0$<br>( $\text{cm}^{-1}$ ) | $\langle A \rangle_0$<br>( $10^{-5}$ ) | $\langle \Delta A \rangle_1$<br>( $10^{-8}$ ) | $\langle \Delta A \rangle_1 / \langle A \rangle_0$<br>( $10^{-3}$ ) | $g_J$<br>( $10^{-2}$ ) |
|-----------------|---------------------------------|----------------------------------------|-----------------------------------------------|---------------------------------------------------------------------|------------------------|
| <i>R</i> (13.5) | 1920.7                          | 5.67                                   | 22.2                                          | 3.92                                                                | 2.09                   |
| <i>R</i> (14.5) | 1923.5                          | 4.87                                   | 25.0                                          | 5.13                                                                | 2.75                   |
| <i>R</i> (15.5) | 1926.3                          | 4.78                                   | 21.7                                          | 4.54                                                                | 2.44                   |
| <i>R</i> (16.5) | 1929.0                          | 4.09                                   | 18.2                                          | 4.45                                                                | 2.38                   |
| <i>R</i> (17.5) | 1931.7                          | 3.57                                   | 16.9                                          | 4.73                                                                | 2.54                   |
| <i>R</i> (18.5) | 1934.4                          | 3.18                                   | 12.7                                          | 3.99                                                                | 2.13                   |
| <i>R</i> (19.5) | 1937.0                          | 2.64                                   | -                                             | -                                                                   | -                      |
| <i>R</i> (20.5) | 1939.6                          | 2.27                                   | 9.95                                          | 4.38                                                                | 2.36                   |
| <i>R</i> (21.5) | 1942.2                          | 1.90                                   | 8.75                                          | 4.61                                                                | 2.46                   |
| <i>R</i> (22.5) | 1944.7                          | 1.39                                   | 6.98                                          | 5.02                                                                | 2.69                   |
| <i>R</i> (23.5) | 1947.2                          | 1.02                                   | 4.12                                          | 4.04                                                                | 2.16                   |
| <i>R</i> (24.5) | 1949.6                          | 0.85                                   | 3.15                                          | 3.71                                                                | 2.00                   |
| <i>R</i> (25.5) | 1952.0                          | 0.64                                   | 2.63                                          | 4.11                                                                | 2.19                   |
|                 |                                 |                                        |                                               |                                                                     |                        |
| <i>P</i> (9.5)  | 1842.9                          | 7.14                                   | 41.0                                          | 5.74                                                                | 3.08                   |
| <i>P</i> (10.5) | 1839.3                          | 6.91                                   | 33.7                                          | 4.88                                                                | 2.62                   |
| <i>P</i> (11.5) | 1835.5                          | 7.07                                   | 31.3                                          | 4.43                                                                | 2.36                   |
| <i>P</i> (12.5) | 1831.8                          | 6.33                                   | 27.1                                          | 4.28                                                                | 2.29                   |
| <i>P</i> (13.5) | 1828.0                          | 5.16                                   | 24.2                                          | 4.69                                                                | 2.52                   |
| <i>P</i> (14.5) | 1824.2                          | 4.83                                   | 22.5                                          | 4.66                                                                | 2.50                   |
| <i>P</i> (15.5) | 1820.4                          | 4.64                                   | 18.0                                          | 3.88                                                                | 2.09                   |
| <i>P</i> (16.5) | 1816.5                          | 3.83                                   | 19.7                                          | 5.14                                                                | 2.76                   |
| <i>P</i> (17.5) | 1812.6                          | 3.33                                   | 13.8                                          | 4.14                                                                | 2.23                   |
| <i>P</i> (18.5) | 1808.7                          | 2.52                                   | 10.8                                          | 4.29                                                                | 2.29                   |
| <i>P</i> (19.5) | 1804.7                          | 2.71                                   | 12.3                                          | 4.54                                                                | 2.43                   |
| <i>P</i> (20.5) | 1800.7                          | 2.02                                   | 13.2                                          | 6.53                                                                | 3.49                   |
| <i>P</i> (21.5) | 1796.6                          | 1.64                                   | 9.31                                          | 5.68                                                                | 3.05                   |
